# Supplementary material for: Microstructure, drug binding and cytotoxicity of Pluronic P123–aerosol OT mixed micelles
Source: Royal Society of Chemistry journal article supplement (doi:10.1039/c3ra44983a), 2013-01-01
Supplement: c3ra44983a.pdf [file c3ra44983a.pdf]

## Supporting Information

### **Microstructure, Drug Binding and Cytotoxicity of Pluronic P123 -Aerosol OT Mixed Micelles**

Jayita Bhattacharjee<sup>#</sup>, Gunjan Verma<sup>#</sup>, V. K. Aswal<sup>\$</sup>, V. Patravale<sup>@</sup> and P. A. Hassan\*<sup>#</sup>

<sup>#</sup>Chemistry Division, <sup>\$</sup>Solid State Physics Division,

Bhabha Atomic Research Centre, Mumbai - 400 085, India.

<sup>@</sup>Department of Pharmaceutical Sciences and Technology, Institute of Chemical Technology,  
Matunga, Mumbai - 400019, India.

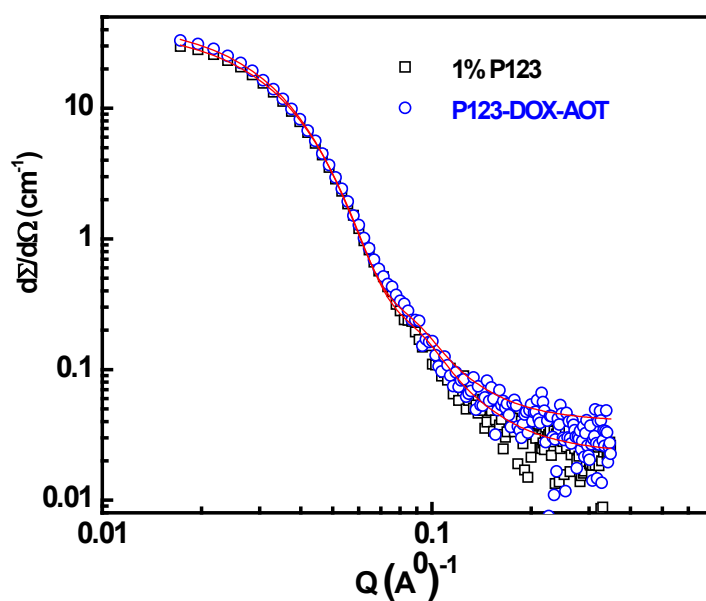

Figure S1. SANS spectra of 1%P123 solution with (blue squares) and without (black squares) 100  $\mu\text{M}$  of DOX-AOT complex. The solid lines are fit to the data.

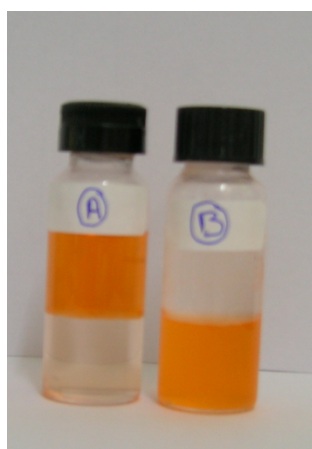

Figure S2. Photograph showing partitioning of the DOX (orange color) from aqueous layer to organic (chloroform) layer by the addition of AOT. (A) 100 $\mu\text{M}$  DOX in water in equilibrium with equal volume of chloroform. (B) 100 $\mu\text{M}$  DOX in equilibrium with chloroform after addition of equal concentration of AOT. The orange color in chloroform layer indicates partitioning of DOX-AOT complex to the hydrophobic layer.

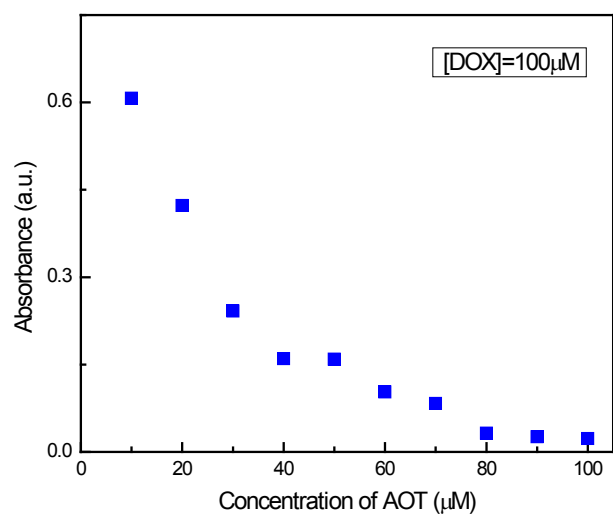

Figure S3. Variation of absorbance (at 480 nm) of the aqueous layer in a water-chloroform mixture (equal volume) containing 100μM DOX , as a function of added AOT concentration.
